# Supplementary material for: Evaluation of a Cardiovascular Systems Model for Design and Analysis of Hemodynamic Safety Studies
Source: MDPI journal article supplement (doi:10.3390/pharmaceutics15041175), 2023-04-07
Supplement: s1 [file s1]

# Supplementary Materials: Evaluation of a Cardiovascular Systems Model for Design and Analysis of Hemodynamic safety Studies

Yu Fu, Nelleke Snelder, Tingjie Guo, Piet H. van der Graaf and J. G. Coen van Hasselt

## Supplemental material 1

\$PROBLEM PK-PD

\$INPUT ID TIME DV AMT DV\_FLAG

\$DATA dat.csv IGNORE=@

\$SUBROUTINES ADVAN13 TOL = 6

\$MODEL

COMP(PK, DEFDOSE)

COMP(HR)

COMP(SVT)

COMP(TPR)

\$PK

;; PK

K = THETA(1)

;; Emax model

EC50 = THETA(2)

EMAX = THETA(3)

;; Feedback

FB = THETA(4)

;; Baseline

BSLHR = THETA(5)\*EXP(ETA(1))

BSLMAP = THETA(6)\*EXP(ETA(2))

BSLCO = THETA(7)\*EXP(ETA(3))

BSLSV = BSLCO/BSLHR

BSLTPR = BSLMAP/BSLCO

;; Kout

KOUTHR = THETA(8)

KOUTSV = THETA(9)

KOUTTPR = THETA(10)

;; HR on SV

HRSV = THETA(11)

;; Kin

KINHR = KOUTHR\*BSLHR/(1 - FB\*BSLMAP)

KINSV = KOUTSV\*BSLSV/(1 - FB\*BSLMAP)

```

KINTPR = KOUTTPR*BSLTPR/(1 - FB*BSLMAP)

;; Initial values
A_0(1) = 0
A_0(2) = BSLHR
A_0(3) = BSLSV
A_0(4) = BSLTPR

PER = 24
HOR1 = THETA(12)
AMP1 = THETA(13)
HOR2 = THETA(14)
AMP2 = AMP1*THETA(15)
PI = 3.1415926535

$DES

SV = A(3)*(1 - HRSV*LOG(A(2)/BSLHR))
CO = A(2)*SV
MAP = CO*A(4)

CSHR = AMP1*COS(1*2*PI*(T+HOR1)/PER)
CSTPR = AMP2*COS(1*2*PI*(T+HOR2)/PER)

;; PK
DADT(1) = -K*A(1)

;; HR
DADT(2) = KINHR*(1+CSHR)*(1 - FB*MAP)*(1 + EMAX*A(1)/(EC50+A(1))) -
KOUTHR*A(2)

;; SVT
DADT(3) = KINSV*(1 - FB*MAP) - KOUTSV*A(3)

;; TPR
DADT(4) = KINTPR*(1+CSTPR)*(1 - FB*MAP) - KOUTTPR*A(4)

$ERROR

COIPRED = A(2)*A(3)*(1 - HRSV*LOG(A(2)/BSLHR))
MAIPRED = COIPRED*A(4)

IF (F.EQ.0) IPRED = 1

IF (DV_FLAG.EQ.2) IPRED = A(2)      ;; HR
IF (DV_FLAG.EQ.3) IPRED = COIPRED  ;; CO
IF (DV_FLAG.EQ.4) IPRED = MAIPRED  ;; MAP

W = IPRED

IF (DV_FLAG.EQ.2) Y = IPRED *(1+EPS(1))
IF (DV_FLAG.EQ.3) Y = IPRED *(1+EPS(2))
IF (DV_FLAG.EQ.4) Y = IPRED *(1+EPS(3))

```

IRES = DV-IPRED

IWRES = IRES/W

\$THETA

(0.17325)FIX; TH1 K

(0, 100) ; TH2 EC50

(-1,1) ; TH3 EMAX

(0, 0.0029) FIX; TH4 FB

(0, 310) FIX; TH5 BSLHR

(0, 155) FIX; TH6 BSLMAP

(0, 69) FIX; TH7 BSLCO

(0, 11.6) FIX; TH8 KOUTHR

(0, 0.126) FIX; TH9 KOUTSV

(0, 3.58) FIX; TH10 KOUTTPR

(0, 0.312) FIX; TH11 HRSV

(0, 8.73) FIX; TH12 HOR HR

(0, 0.0918) FIX; TH13 AMP HR

(0, 19.3) FIX; TH14 HOR TPR

(1 FIX) ; TH15 AMP TPR ratio

\$OMEGA

(0.00372) ; IIV\_BSLHR

(0.00137) ; IIV\_BSLMAP

(0.0515) ; IIV\_BSLCO

\$SIGMA

0.006084 ; Prop.err on HR

0.004761 ; Prop.err on CO

0.0036 ; Prop.err on MAP

\$EST METHOD=1 INTER MAXEVAL=5000 NOABORT SIG=3 PRINT=5 POSTHOC

\$COV

\$TABLE ID TIME DV AMT DV\_FLAG MDV EVID IPRED PRED ONEHEADER  
NOPRINT FILE=sdtab001

**Table S1.** Simulation scenarios of the practical identifiability analysis <sup>a</sup>.

|                                                        | Number of animals | MoA of the Original model | EC <sub>50</sub> (ng/ml) | E <sub>max</sub> | Number of doses <sup>b</sup> | Observations          | Observation duration | MoA of the Alternative model |
|--------------------------------------------------------|-------------------|---------------------------|--------------------------|------------------|------------------------------|-----------------------|----------------------|------------------------------|
| Quantification of system- and drug-specific parameters | 5                 | HR                        | 100                      | -1               | 3 / 5                        | HR, CO, MAP / HR, MAP | 24h                  | HR                           |
|                                                        | 5                 | SV                        | 100                      | -1               | 3 / 5                        | HR, CO, MAP / HR, MAP | 24h                  | SV                           |
|                                                        | 5                 | TPR                       | 100                      | -1               | 3 / 5                        | HR, CO, MAP / HR, MAP | 24h                  | TPR                          |

|                                                           |           |     |              |             |   |                       |                  |                      |
|-----------------------------------------------------------|-----------|-----|--------------|-------------|---|-----------------------|------------------|----------------------|
| Identification of MoA with different drug effects         | 5         | HR  | 100 / 1000   | -1 / 1 / 10 | 3 | HR, CO, MAP / HR, MAP | 24h              | None / HR / SV / TPR |
|                                                           | 5         | SV  | 100 / 1000   | -1 / 1 / 10 | 3 | HR, CO, MAP / HR, MAP | 24h              | None / HR / SV / TPR |
|                                                           | 5         | TPR | 100 / 1000   | -1 / 1 / 10 | 3 | HR, CO, MAP / HR, MAP | 24h              | None / HR / SV / TPR |
| Identification of MoA with different observation duration | 5         | HR  | 100 / 100000 | -1          | 3 | HR, CO, MAP / HR, MAP | 3 / 6 / 12 / 24h | None / HR / SV / TPR |
|                                                           | 5         | SV  | 100 / 100000 | -1          | 3 | HR, CO, MAP / HR, MAP | 3 / 6 / 12 / 24h | None / HR / SV / TPR |
|                                                           | 5         | TPR | 100 / 100000 | -1          | 3 | HR, CO, MAP / HR, MAP | 3 / 6 / 12 / 24h | None / HR / SV / TPR |
| Identification of MoA with different number of animals    | 3 / 4 / 5 | HR  | 100 / 100000 | -1          | 3 | HR, CO, MAP / HR, MAP | 24h              | None / HR / SV / TPR |
|                                                           | 3 / 4 / 5 | SV  | 100 / 100000 | -1          | 3 | HR, CO, MAP / HR, MAP | 24h              | None / HR / SV / TPR |
|                                                           | 3 / 4 / 5 | TPR | 100 / 100000 | -1          | 3 | HR, CO, MAP / HR, MAP | 24h              | None / HR / SV / TPR |

<sup>a</sup> HR: heart rate; SV: stroke volume; CO: cardiac output; TPR: total peripheral resistance; MAP: mean arterial pressure; MoA: mode of action.

<sup>b</sup> three ascending doses: 0.1 mg/kg, 1 mg/kg and 10 mg/kg *i.v.* bolus on day 1, 2 and 3; five ascending doses: 0.1 mg/kg, 0.3 mg/kg, 1 mg/kg, 3 mg/kg and 10 mg/kg *i.v.* bolus on day 1 to 5.

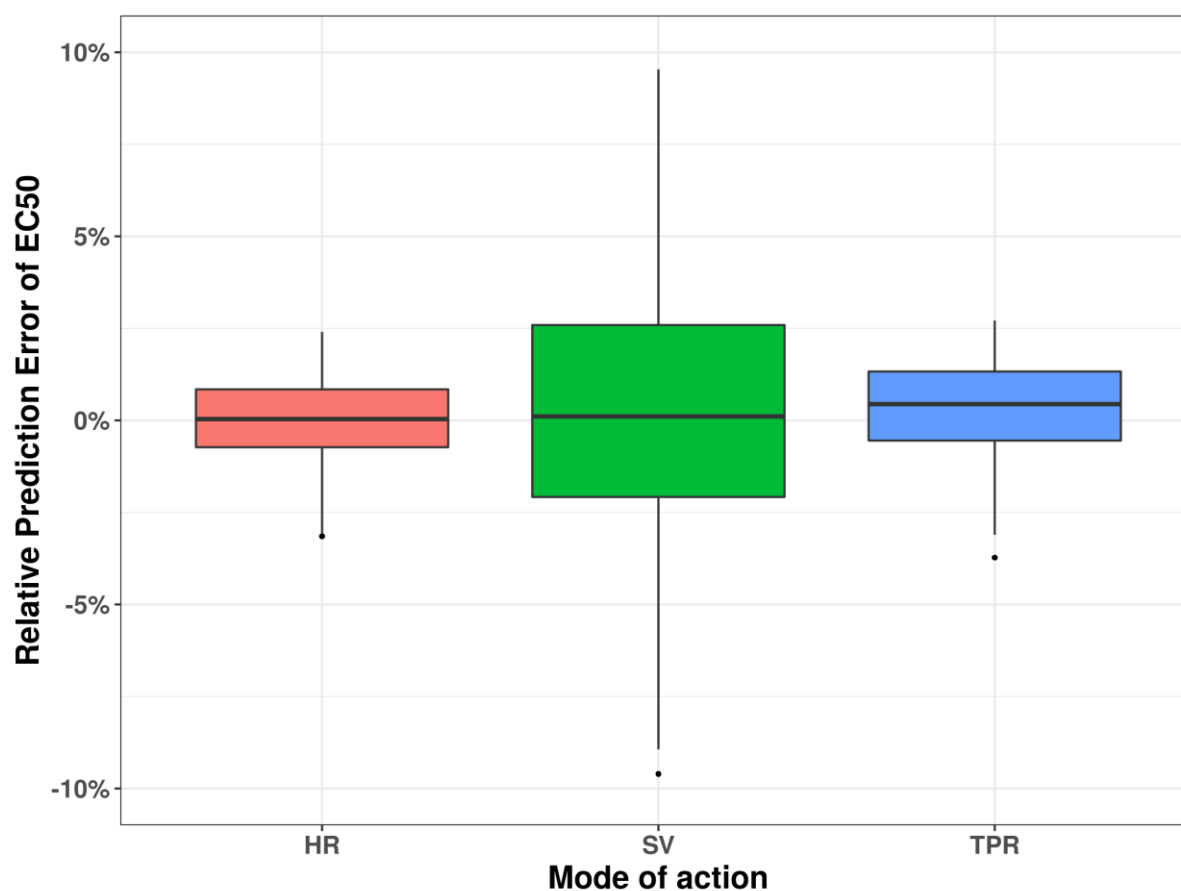

**Figure S1.** Comparison of final estimates of EC<sub>50</sub> in models with unfixed and fixed system-specific parameters.

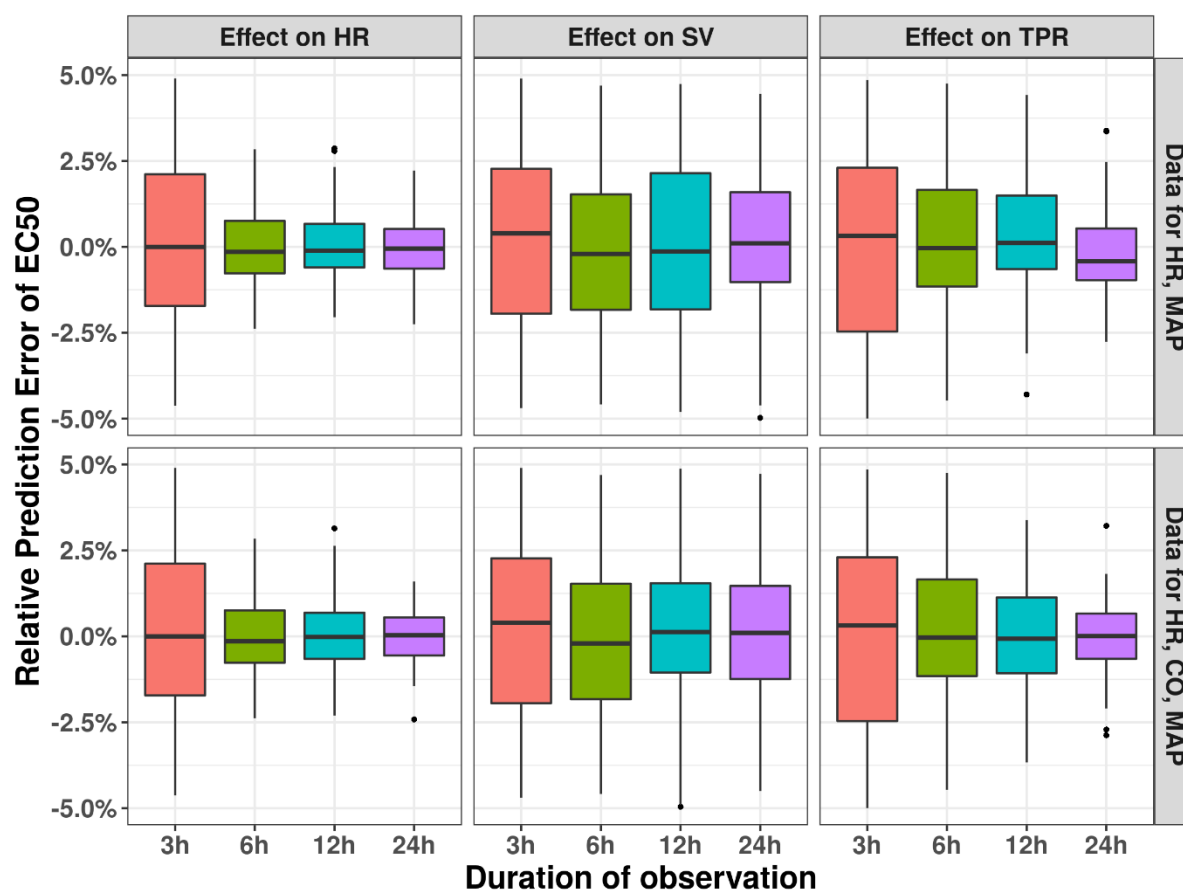

**Figure S2.** Relative prediction error of  $EC_{50}$  in SSE analyses with observations of HR and MAP or observations of HR, CO and MAP within 3h, 6h, 12h and 24h, while  $E_{max}$  was fixed as -1 and  $EC_{50}$  was fixed as 100 ng/ml in the original model. The relative prediction error is defined as the ratio of the difference of the parameters' estimates and the parameters' true values over the parameters' true values.

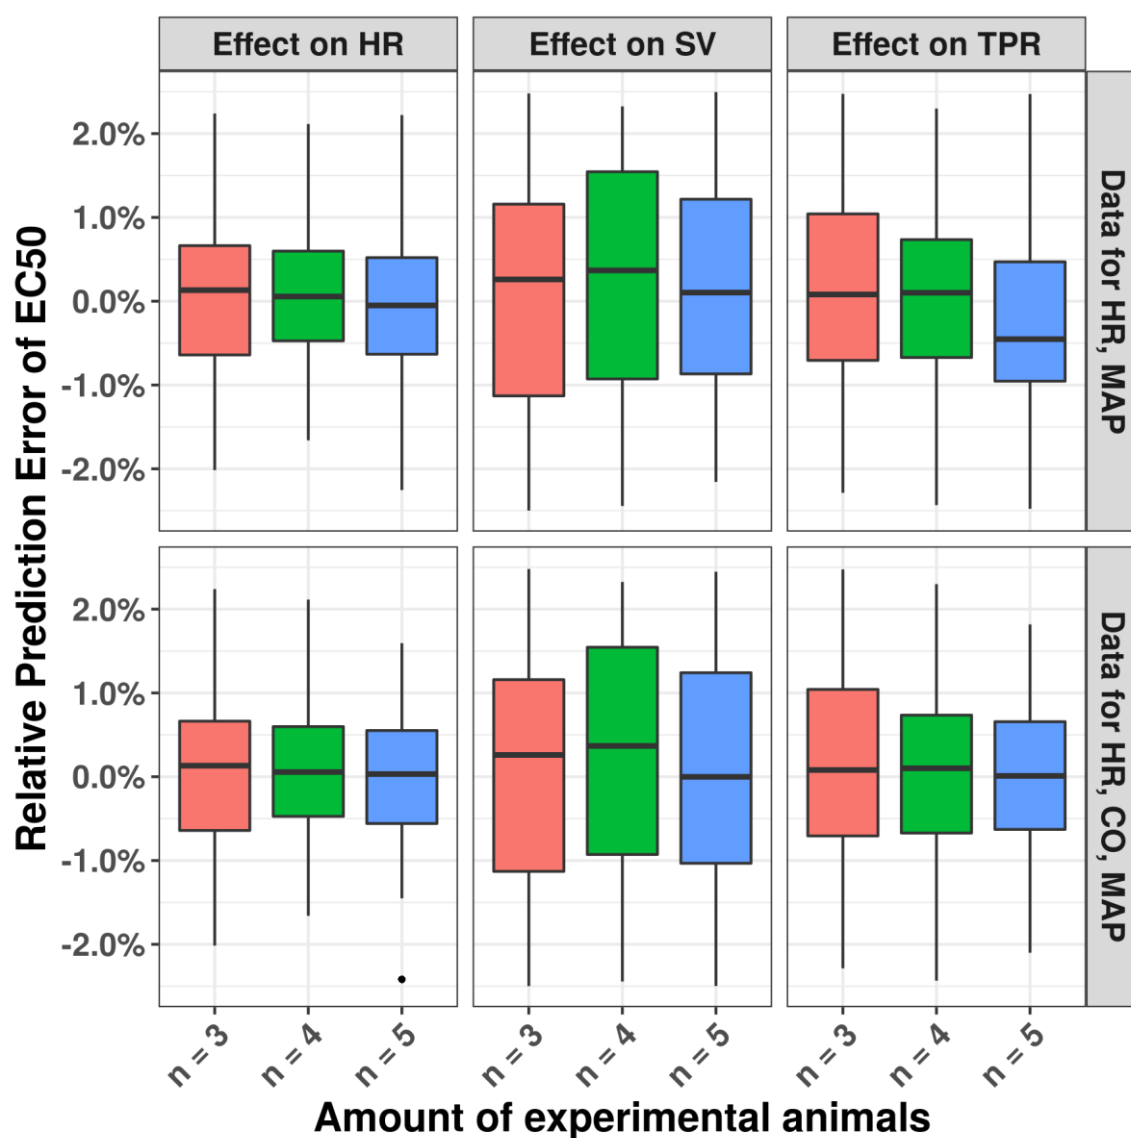

**Figure S3.** Relative prediction error of  $EC_{50}$  in SSE analyses using data for 3, 4, or 5 animals with observations of HR and MAP or observations of HR, CO and MAP, while  $E_{max}$  was fixed as -1 and  $EC_{50}$  was fixed as 100 ng/ml in the original model. The relative prediction error is defined as the ratio of the difference of the parameters' estimates and the parameters' true values over the parameters' true values.
